# Supplementary material for: Production of Polyphenolic Natural Products by Bract-Derived Tissue Cultures of Three Medicinal Tilia spp.: A Comparative Untargeted Metabolomics Study
Source: MDPI journal article supplement (doi:10.3390/plants13101288), 2024-05-07
Supplement: s1 [file s1]

# Supplementary, Results and discussion

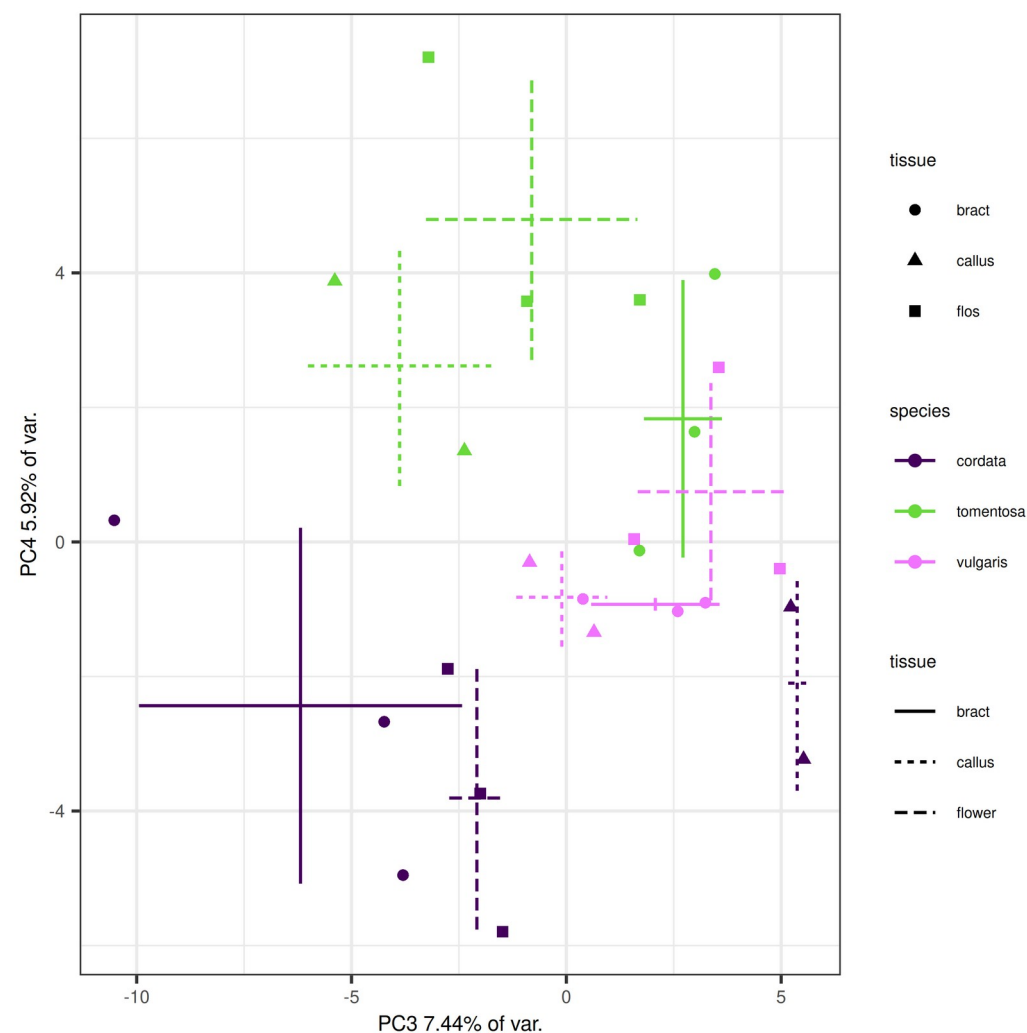

**Figure S1.** Principal component analysis biplot showing separation of various species of different *Tilia* spp. according to their plant metabolome features. Principal components PC3 and PC4 are plotted. Axes show principal component order, with explained variance. Crosses denote average  $\pm$  standard deviation for a species--organ pair (solid line, bract; dashed line, callus; long-dashed line, flower). Point shapes denote tissue type: circle, bract; triangle, callus; square: flower. Color denotes different *Tilia* species: purple, *T. cordata*; green, *T. tomentosa*; magenta, *T. vulgaris*.

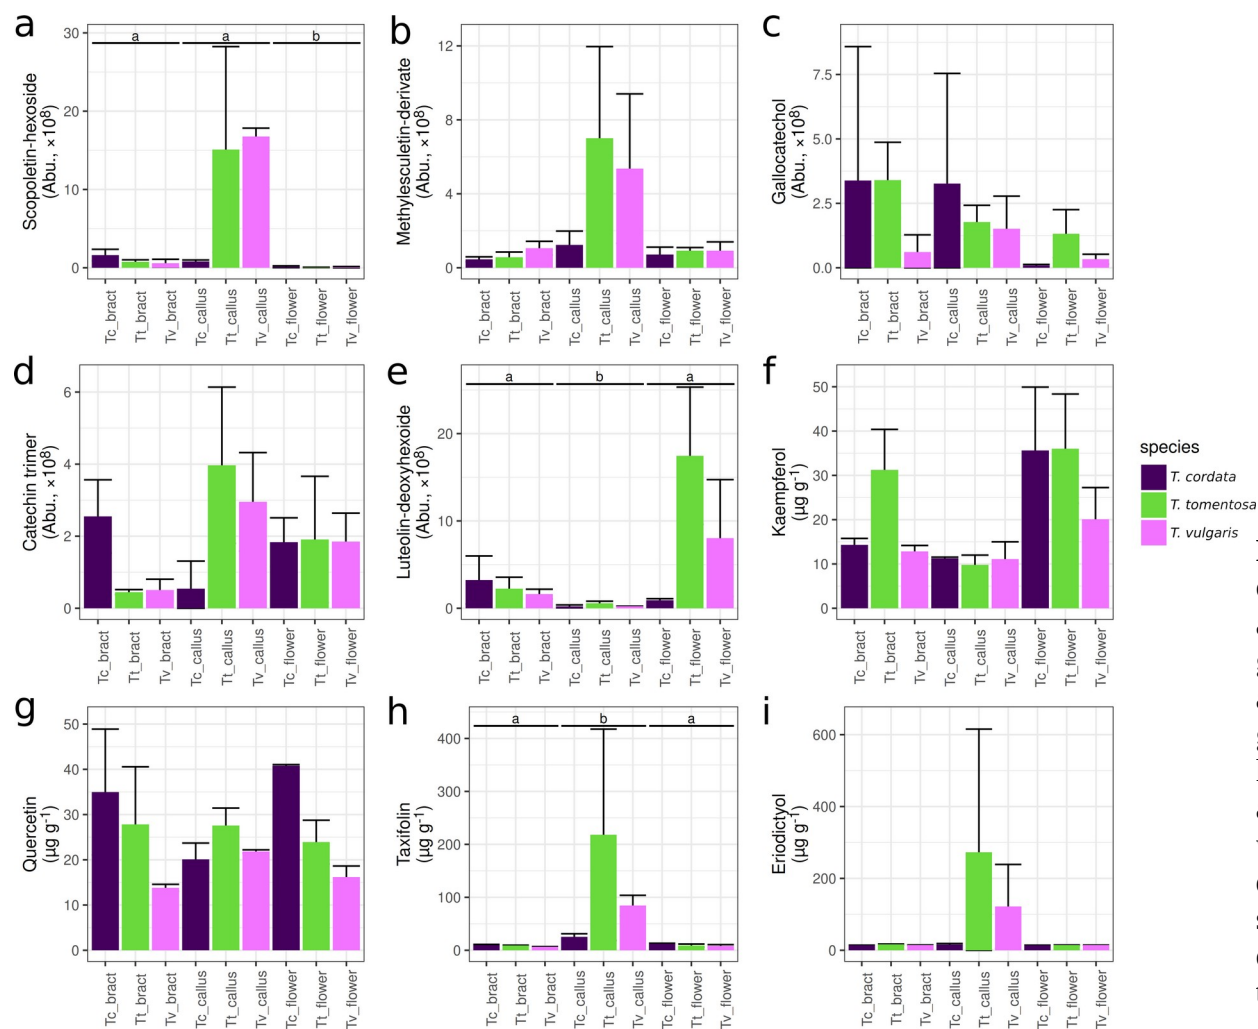

**Figure S2.** Concentrations or relative abundances of key bioactive constituents from various organs of *Tilia* species. Where an authentic standard was available,  $\mu\text{g g}^{-1}$  (dry weight basis) are given. In other subplots, raw abundance data are shown. Subplots: a., scopoletin-O-hexoside; b., methylesculetin derivative; c., galliccatechol; d., catechin trimer; e., luteolin-O-deoxyhexoside; f., kaempferol; g., quercetin; h., taxifolin; i., eriodictyol. Species abbreviations: Tc, *Tilia cordata*; Tt, *Tilia tomentosa*; Tv, *Tilia vulgaris*. Organs not sharing the same letter are significantly different at  $p < 0.05$  (Dunn's test, followed by a BY-adjusted, significant Kruskal-Wallis test). Where no letters are present, the organs are not significantly different (BY-adjusted Kruskal-Wallis test).

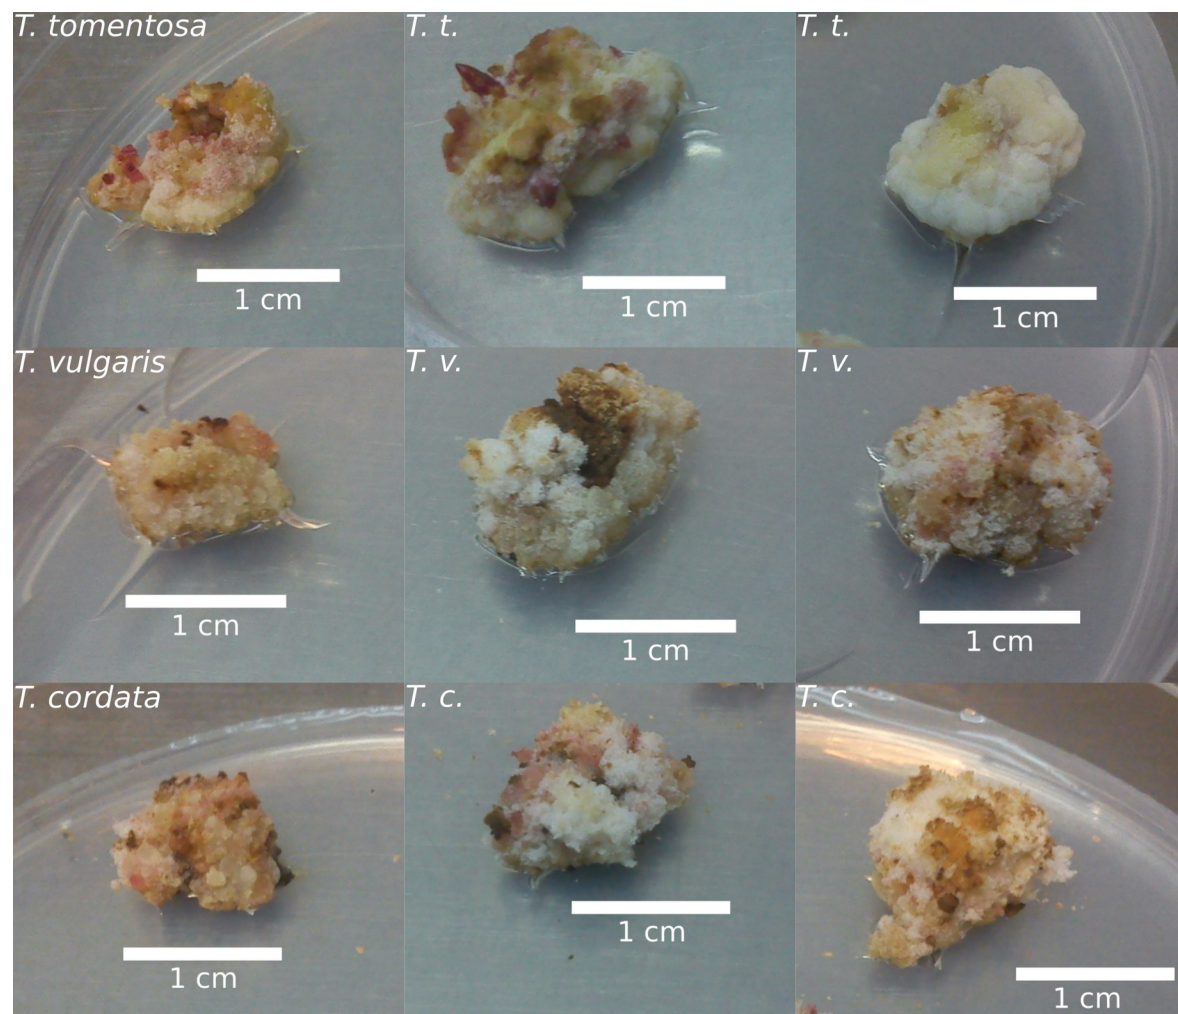

**Figure S3.** Photos of stable callus cultures of tested *Tilia* species, at the end of their 28-day culture period, before harvesting. Species names are indicated in the subplots in the top left corner.

**Table S1.** Method performance parameters. Abbreviations: LLOQ, lower limit of quantification; RSD, relative standard deviation; ULOQ, upper limit of quantification.

|                                                                    | Scopoletin | Catechin  | Quercetin | Kaempferol | Taxifolin | Eriodictol | Astragalin | Isoquercitrin | Esculin   |
|--------------------------------------------------------------------|------------|-----------|-----------|------------|-----------|------------|------------|---------------|-----------|
| LLOQ ( $\mu\text{g mL}^{-1}$ ) <sup>a</sup>                        | 0.01       | 0.01      | 0.01      | 0.01       | 0.03      | 0          | 0.1        | 0.1           | 0.01      |
| ULOQ ( $\mu\text{g mL}^{-1}$ ) <sup>a</sup>                        | 1          | 25        | 1         | 1          | 1         | 2.5        | 25         | 25            | 2.5       |
| Equation linearity ( $R^2$ ) <sup>a</sup>                          | 0.9985     | 0.9922    | 0.9979    | 0.9983     | 0.9982    | 0.9969     | 0.9941     | 0.9753        | 0.9985    |
| Equation slope <sup>a</sup>                                        | 1.55E+07   | 2.43E+07  | 7.22E+07  | 1.04E+08   | 3.61E+07  | 5.38E+07   | 4.01E+07   | 2.17E+07      | 1.44E+08  |
| Equation intercept <sup>a</sup>                                    | 1.90E+04   | -4.98E+06 | -1.82E+06 | -2.24E+06  | -5.71E+05 | -1.90E+06  | -1.11E+07  | -1.62E+07     | -5.09E+06 |
| Intraday repeatability                                             | 0.01       | 0.5       | 0.01      | 0.01       | 0.01      | 0.01       | 0.5        | 1.25          | 0.13      |
| accuracy, +25% level spike concentration ( $\mu\text{g mL}^{-1}$ ) | 133.64%    | 101.01%   | 159.07%   | 149.59%    | 106.88%   | 95.31%     | 112.3%     | 108.94%       | 133.79%   |
| accuracy +25% level recovery                                       | 0.03       | 1         | 0.03      | 0.01       | 0.03      | 0.03       | 1          | 2.5           | 0.25      |
| accuracy, +50% level spike concentration ( $\mu\text{g mL}^{-1}$ ) | 91.77%     | 82.14%    | 121.39%   | 112.97%    | 87.92%    | 82.53%     | 92.76%     | 90.66%        | 101.05%   |
| accuracy +50% level recovery                                       | 0.01       | 0.01      | 0.01      | 0.01       | 0.03      | 0          | 0.1        | 0.1           | 0.01      |

Notes: <sup>a</sup>: data are given for calibration curves used during quantification.

**Table S2. [Separate CSV file!]**

Features obtained from the untargeted metabolomics approach via LC-ESI-MS. Only the features that passed QC as in section 2.5. are presented.

Column name legend:

mzmed, median of m/z values;

rtmed, median of retention time values (min);

polarity, ESI MS polarity during detection. 1, positive; -1, negative.

pvaldj, Kruskal-Wallis test p-value (significant difference among organ types), BY adjusted;

sigtxt, significance for BY adjusted p-values;

cordata\_bract - vulgaris\_flos, raw abundance values (mean values), Dunn test results (if adjusted Kruskal-Wallis test is significant);

molecularFormula, SIRIUS suggestion for molecular formula;

adduct, NPC.pathway, NPC.pathway.Probability, NPC.superclass, NPC.superclass.Probability, NPC.class, NPC.class.Probability, ClassyFire.most.specific.class, ClassyFire.most.specific.class.Probability, ClassyFire.level.5, ClassyFire.level.5.Probability, ClassyFire.subclass, ClassyFire.subclass.Probability, ClassyFire.class, ClassyFire.class.Probability, ClassyFire.superclass, ClassyFire.superclass.probability : SIRIUS class annotation output with probabilities ranging 0-1;

where: whether a features was found in targeted, untargeted or both fragmentation approaches. If found in both, which yielded a more confident annotation;

name: identification after manual evaluation.

**Table S3.** Average concentrations of key bioactive constituents from various organs of *Tilia* species. Data are averages of 2-3 replicates and are expressed in  $\mu\text{g g}^{-1}$  DW.

| Species   | Tissue type | Scopoletin | Esculin | Catechin | Quercetin | Kaempferol | Taxifolin | Eriodictol | Astragalin | Isoquercitrin |
|-----------|-------------|------------|---------|----------|-----------|------------|-----------|------------|------------|---------------|
| cordata   | bract       | 3.47       | 24.44   | 1,051.23 | 34.97     | 14.33      | 9.26      | 13.99      | 824.02     | 4,471.72      |
| tomentosa | bract       | 7.28       | 17.98   | 1,035.00 | 27.83     | 31.26      | 9.11      | 16.41      | 552.69     | 1,382.96      |
| vulgaris  | bract       | 10.09      | 25.83   | 318.15   | 13.82     | 12.84      | 6.60      | 14.28      | 340.16     | 567.68        |
| cordata   | callus      | 22.42      | 85.36   | 1,666.61 | 20.11     | 11.28      | 25.20     | 16.13      | 141.98     | 401.58        |
| tomentosa | callus      | 63.85      | 201.31  | 5,936.71 | 27.57     | 9.80       | 218.15    | 272.98     | 126.58     | 440.97        |
| vulgaris  | callus      | 49.19      | 190.72  | 3,059.93 | 21.82     | 11.10      | 84.49     | 122.00     | 127.56     | 476.63        |
| cordata   | flos        | 13.89      | 17.88   | 124.75   | 40.79     | 35.63      | 12.29     | 13.99      | 1,819.00   | 8,133.86      |
| tomentosa | flos        | 11.28      | 15.86   | 242.68   | 23.91     | 36.04      | 8.95      | 14.20      | 4,400.02   | 6,384.95      |
| vulgaris  | flos        | 16.11      | 15.89   | 94.53    | 16.17     | 20.11      | 8.47      | 14.16      | 1,183.27   | 1,672.89      |

## Supplementary, Materials and methods

Section numbering is the same as for the main paper.

### 4.1. Chemicals. List of vendors for WPM components.

Boric acid (Reanal), calcium chloride (Reanal), calcium nitrate (Reanal), copper-sulfate-pentahydrate (Reanal), disodium-EDTA (Reanal), iron(II)-sulfate (Reanal), magnesium-sulfate (Reanal), manganese sulfate (Reanal), sodium molybdenate (Reanal), potassium dihydrogen phosphate (Reanal), zinc sulfate heptahydrate (Reanal), ammonium nitrate (Reanal), potassium sulfate (Reanal); myo-inositol (Reanal), nicotinic acid (Reanal), pyridoxine hydrochloride (Carl Roth), thiamine hydrochloride (Carl Roth), saccharose (VWR), agar-agar (VWR), 2,4-dichlorophenoxyacetic acid (2,4-D) (Sigma Aldrich), benzyl-aminopurine (BAP) (Sigma Aldrich).

### 4.3.1. Sample preparation, drying procedure.

The dried samples were homogenized using a mortar and pestle using liquid N<sub>2</sub>. Thereafter, an accurately weighed, approximately 25 mg amount of material was thoroughly mixed with 1 ml MeOH, maintained at room temperature for 10 min and subsequently extracted at 75 °C for 30 min. The mixture was centrifuged at 13,000 rpm for 3 min and the obtained supernatant was stored at -24 °C.

### 4.3.2. LC-ESI-MS parameters.

The UHPLC system (Dionex Ultimate 3000RS) was coupled with a Thermo Q Exactive Orbitrap mass spectrometer (Thermo Fisher Scientific Inc., Waltham, USA) equipped with an electrospray ionization source (ESI). The HPLC separation was achieved on a Phenomenex Kinetex XB-C18 column (100 mm × 2.1 mm × 2.6 μm). Oven temperature was maintained at 30 °C, and flow rate was 250 μL min<sup>-1</sup>. Eluent A was water containing 0.1% formic acid and eluent B was acetonitrile (Fisher Scientific, USA) containing 0.1% formic acid. The following gradient elution program was used: 0 min, 2.5% B; 0–2 min, 5% B; 2–7 min, 100% B; 7–8.5 min, 100% B; 8.5–9.5, 2.5% B; 9.5–16, 2.5% B. A 1 μL aliquot of the samples (equivalent to 2.5 μg of plant DW) were injected in every run. The Q Exactive hybrid quadrupole-orbitrap mass spectrometer was operated in either positive or negative ion mode, at the resolution of 35,000 and the scan range was 100–1000 m/z. Additional parameters were: sheath gas flow rate, 32; Aux gas flow rate, 7; Sweep gas flow rate, 0; Spray voltage [kV], 4; Capillary temperature (C), 320; Aux gas heater temp (C), 60.

#### 4.3.4. Metabolite annotation. MS/MS parameters.

**Table S4.** Data-dependent MS/MS parameters (ddMS) for targeted LC-MS/MS.

|                          |            |
|--------------------------|------------|
| <b>General</b>           |            |
| Default charge           | 1          |
| <b>Full MS</b>           |            |
| Resoulution              | 35 000     |
| AGC Target               | 3e6        |
| Maximum IT               | 100 ms     |
| Scan Range               | 100 - 1500 |
| <b>dd-MS<sup>2</sup></b> |            |
| Resolution               | 17 500     |
| AGC target               | 1e5        |
| Maximum IT               | 50ms       |
| Loop count               | 5          |
| TopN                     | 5          |
| Isolation window         | 1.0 m/z    |
| Fixed first mass         | -          |
| (N)CE / stepped nce:     | 30, 50     |
| <b>dd Settings</b>       |            |
| maximum AGC target       | 8e3        |
| Intensity threshold      | 1.6e5      |
| Apex trigger             | -          |
| Charge exclusion         | 2-8, >8    |
| Peptide match            | -          |
| Exclude isotopes         | on         |
| Dynamic exclusion        | 2.0s       |



**Table S5.** Data-dependent MS/MS parameters (ddMS) for untargeted LC-MS/MS.

|                          |            |
|--------------------------|------------|
| <b>General</b>           |            |
| Default charge           | 1          |
| <b>Full MS</b>           |            |
| Resoulution              | 35 000     |
| AGC Target               | 3e6        |
| Maximum IT               | 100 ms     |
| Scan Range               | 100 - 1500 |
| <b>dd-MS<sup>2</sup></b> |            |
| Resolution               | 17 500     |
| AGC target               | 2e5        |
| Maximum IT               | 100ms      |
| Loop count               | 5          |
| TopN                     | 5          |
| Isolation window         | 2.0 m/z    |
| Fixed first mass         | -          |
| (N)CE / stepped nce:     | 30         |
| <b>dd Settings</b>       |            |
| maximum AGC target       | 8e3        |
| Intensity threshold      | 8e4        |
| Apex trigger             | -          |
| Charge exclusion         | 2-8, >8    |
| Peptide match            | -          |
| Exclude isotopes         | on         |
| Dynamic exclusion        | 2.0s       |

#### 4.3.5. Quality controlled, untargeted metabolomics

In case of features for which no authentic standards are available, linearity and precision values were estimated from so-called quality control (QC) samples to keep reliably measurable features for downstream analysis [72]. The “intra-study QC” approach was used [72] with parameters already used in our recent study [75].

In particular, a mixture of aliquots from all samples mixed in equal volumes was used, referred to as “intra-study QC”. A serial dilution from 25-fold to concentrated QC was used to assess linearity, two injections were done per concentration. Linearity calculation contained the process blank as a zero. Other QC samples were 10-fold diluted, like the real samples. Samples were injected in a randomized order, after a pre-equilibration block of 10-fold diluted QC samples and the linearity samples. The injection order is given in Table S6. In the main sequence, QC samples were injected for every 6th run. During feature filtering, only those features are used in downstream analysis which (1) showed >0.8 linearity in the set of serially diluted QC samples, (2) showed <0.3 relative standard deviation in QC samples of the main sequence block. The features that passed were subjected to a LOESS readjustment to account for local inhomogeneities of sensitivity along the sequence [75], expressing values as fold changes versus QC.

**Table S6.** XCMS Online automated peak search parameters.

|                                  |          |
|----------------------------------|----------|
| <b>Feature detection</b>         |          |
| method                           | centWave |
| ppm                              | 2.5      |
| minimum peak width               | 2.5      |
| maximum peak width               | 25       |
| mzdiff                           | 0.01     |
| Signal/Noise threshold           | 10       |
| Integration method               | 1        |
| prefilter peaks                  | 3        |
| prefilter intensity              | 5000     |
| Noise Filter                     | 1000     |
| <b>Retention time correction</b> |          |
| method                           | obiwarp  |
| profStep                         | 1        |
| <b>Alignment</b>                 |          |

|         |      |
|---------|------|
| bw      | 5    |
| minfrac | 0.5  |
| mzwid   | 0.02 |
| minsamp | 1    |
| max     | 100  |

**Table S7.** Injection order for untargeted metabolomics

| Block             | Sample          |
|-------------------|-----------------|
| wash              | wash            |
| blank             | solventblank_i1 |
| blank             | solventblank_i2 |
| blank             | processblank_i1 |
| blank             | processblank_i2 |
| sst               | sst             |
| calibration_curve | cc1_0_01_i1     |
| calibration_curve | cc1_0_025_i1    |
| calibration_curve | cc1_0_1_i1      |
| calibration_curve | cc1_0_25_i1     |
| calibration_curve | cc1_1_i1        |
| calibration_curve | cc1_2_5_i1      |
| calibration_curve | cc1_10_i1       |
| calibration_curve | cc2_0_01_i1     |
| calibration_curve | cc2_0_025_i1    |
| calibration_curve | cc2_0_1_i1      |
| calibration_curve | cc2_0_25_i1     |
| calibration_curve | cc2_1_i1        |
| calibration_curve | cc2_2_5_i1      |
| calibration_curve | cc2_10_i1       |
| pre-equilibration | qcpre_i01       |
| pre-equilibration | qcpre_i02       |
| qc_linearity      | qc_25xd_i1      |
| qc_linearity      | qc_25xd_i2      |
| qc_linearity      | qc_10xd_i1      |
| qc_linearity      | qc_10xd_i2      |
| qc_linearity      | qc_05xd_i1      |
| qc_linearity      | qc_05xd_i2      |
| qc_linearity      | qc_01xd_i1      |

|                   |                    |
|-------------------|--------------------|
| qc_linearity      | qc_01xd_i2         |
| pre-equilibration | qcpre_i03          |
| pre-equilibration | qcpre_i04          |
| qc_accuracy       | qca_1_i1           |
| qc_accuracy       | qca_1_i2           |
| qc_accuracy       | qca_1_i3           |
| qc_accuracy       | qca_2_5_i1         |
| qc_accuracy       | qca_2_5_i2         |
| qc_accuracy       | qca_2_5_i3         |
| qc_accuracy       | qca_10_i1          |
| qc_accuracy       | qca_10_i2          |
| qc_accuracy       | qca_10_i3          |
| pre-equilibration | qcpre_i05          |
| pre-equilibration | qcpre_i06          |
| pre-equilibration | qcpre_i07          |
| real_block_w_qcs  | qc_rei_i1          |
| real_block_w_qcs  | QC                 |
| real_block_w_qcs  | cordata_flos_2     |
| real_block_w_qcs  | tomentosa_flos_2   |
| real_block_w_qcs  | vulgaris_bract_1   |
| real_block_w_qcs  | vulgaris_flos_3    |
| real_block_w_qcs  | QC                 |
| real_block_w_qcs  | vulgaris_flos_1    |
| real_block_w_qcs  | tomentosa_callus_1 |
| real_block_w_qcs  | qc_rei_i2          |
| real_block_w_qcs  | tomentosa_flos_3   |
| real_block_w_qcs  | vulgaris_flos_2    |
| real_block_w_qcs  | QC                 |
| real_block_w_qcs  | tomentosa_bract_3  |
| real_block_w_qcs  | cordata_flos_3     |

|                   |                    |
|-------------------|--------------------|
| real_block_w_qcs  | cordata_callus_2   |
| real_block_w_qcs  | tomentosa_bract_1  |
| real_block_w_qcs  | QC                 |
| real_block_w_qcs  | qc_rei_i3          |
| real_block_w_qcs  | vulgaris_callus_2  |
| real_block_w_qcs  | cordata_flos_1     |
| real_block_w_qcs  | tomentosa_flos_1   |
| real_block_w_qcs  | cordata_bract_2    |
| real_block_w_qcs  | QC                 |
| real_block_w_qcs  | cordata_bract_3    |
| real_block_w_qcs  | vulgaris_bract_3   |
| real_block_w_qcs  | vulgaris_callus_1  |
| real_block_w_qcs  | cordata_bract_1    |
| real_block_w_qcs  | qc_rei_i4          |
| real_block_w_qcs  | QC                 |
| real_block_w_qcs  | vulgaris_bract_2   |
| real_block_w_qcs  | tomentosa_callus_2 |
| real_block_w_qcs  | tomentosa_bract_2  |
| real_block_w_qcs  | cordata_callus_1   |
| real_block_w_qcs  | QC                 |
| real_block_w_qcs  | qc_rei_i5          |
| qualitative_block | aif_neg            |
| qualitative_block | ddms_neg_mzrange_1 |
| qualitative_block | ddms_neg_mzrange_2 |
| qualitative_block | ddms_neg_mzrange_3 |
| qualitative_block | ddms_neg_mzrange_4 |
| qualitative_block | ddms_neg_mzrange_5 |
| qualitative_block | ddms_neg_mzrange_6 |
| qualitative_block | ddms_neg_mzrange_7 |
| qualitative_block | ddms_neg_mzrange_8 |

|                   |                    |
|-------------------|--------------------|
| qualitative_block | ddms_neg_mzrange_9 |
| qualitative_block | aif_pos            |
| qualitative_block | ddms_pos_mzrange_1 |
| qualitative_block | ddms_pos_mzrange_2 |
| qualitative_block | ddms_pos_mzrange_3 |
| qualitative_block | ddms_pos_mzrange_4 |
| qualitative_block | ddms_pos_mzrange_5 |
| qualitative_block | ddms_pos_mzrange_6 |
| qualitative_block | ddms_pos_mzrange_7 |
| qualitative_block | ddms_pos_mzrange_8 |
| qualitative_block | ddms_pos_mzrange_9 |
| wash              | wash_1             |
| calibration_curve | cc1_0_01_i2        |
| calibration_curve | cc1_0_025_i2       |
| calibration_curve | cc1_0_1_i2         |
| calibration_curve | cc1_0_25_i2        |
| calibration_curve | cc1_1_i2           |
| calibration_curve | cc1_2_5_i2         |
| calibration_curve | cc1_10_i2          |
| calibration_curve | cc2_0_01_i2        |
| calibration_curve | cc2_0_025_i2       |
| calibration_curve | cc2_0_1_i2         |
| calibration_curve | cc2_0_25_i2        |
| calibration_curve | cc2_1_i2           |
| calibration_curve | cc2_2_5_i2         |
| calibration_curve | cc2_10_i2          |

## References

72. Kirwan, J.A.; Gika, H.; Beger, R.D.; Bearden, D.; Dunn, W.B.; Goodacre, R.; Theodoridis, G.; Witting, M.; Yu, L.-R.; Wilson, I.D.; et al. Quality Assurance and Quality Control Reporting in Untargeted Metabolic Phenotyping: mQACC Recommendations for Analytical Quality Management. *Metabolomics* 2022, 18, 70. <https://doi.org/10.1007/s11306-022-01926-3>.
75. Gonda, S.; Szűcs, Z.; Plaszkó, T.; Cziáky, Z.; Kiss-Szikszai, A.; Sinka, D.; Bácskay, I.; Vasas, G. Quality-Controlled LC-ESI-MS Food Metabolomics of Fenugreek (*Trigonella foenum-Graecum*) Sprouts: Insights into Changes in Primary and Specialized Metabolites. *Food Res. Int.* 2023, 164, 112347. <https://doi.org/10.1016/j.foodres.2022.112347>.
