# Supplementary material for: Production of Polyphenolic Natural Products by Bract-Derived Tissue Cultures of Three Medicinal Tilia spp.: A Comparative Untargeted Metabolomics Study
Source: Plants (Basel). 2024 May 7;13(10):1288. doi: 10.3390/plants13101288 (PMC11124948; doi:10.3390/plants13101288)
Supplement: Supplementary file 1 [file plants-13-01288-s001.zip › Table_S2.csv]

mzmed	rtmed	polarity	pvadj	sigtxt	cordata_bract	tomentosa_bract	vulgaris_bract	cordata_callus	tomentosa_callus	vulgaris_callus	cordata_flos	tomentosa_flos	vulgaris_flos	molecularFormula	adduct	NPC.pathway	NPC.pathway.Probability	NPC.superclass	NPC.superclass.Probability	NPC.class	NPC.class.Probability	ClassyFire.most.specific.class	ClassyFire.most.specific.class.Probability	ClassyFire.level.5	ClassyFire.level.5.Probability	ClassyFire.subclass	ClassyFire.subclass.Probability	ClassyFire.class	ClassyFire.class.Probability	ClassyFire.superclass	ClassyFire.superclass.probability	where	name
291.0859	7.95	1	0.05229		267100000	61270000	46270000	202100000	528600000	542600000	83330000	176900000	96020000	C15H14O6	[M + H]+	Shikimates and Phenylpropanoids	0.9998	Flavonoids	0.9996	Flavan-3-ols	1	Catechins	0.9951	Flavan-3-ols	0.9941	Flavans	0.9969	Flavonoids	0.999	Phenylpropanoids and polyketides	0.9949	both_untrg_better
193.0494	8.42	1	0.03421	*	2589000	3904000	3436000	5893000	15560000	14710000	5226000	4178000	5586000	C10H8O4	[M + H]+	Shikimates and Phenylpropanoids	0.9946	Coumarins	0.9956	Simple coumarins	0.9043	7,8-dihydroxycoumarins	0.863	7,8-dihydroxycoumarins	0.863	Hydroxycoumarins	0.9624	Coumarins and derivatives	0.9889	Phenylpropanoids and polyketides	0.9944		Scopoletin
381.0788	1.55	1	1		180900000	331500000	107500000	236100000	243400000	490500000	190300000	216700000	76340000	NA	NA	NA	NA	NA	NA	NA	NA	NA	NA	NA	NA	NA	NA	NA	NA	NA	NA	NA
465.1023	8.25	1	0.01074	*	119700000	38380000	8482000	10120000	5481000	7276000	250700000	197800000	87240000	C21H20O12	[M + H]+	Shikimates and Phenylpropanoids	0.9998	Flavonoids	0.998	Flavonols	0.9947	Flavonoid-3-O-glycosides	0.7672	Flavonoid O-glycosides	0.995	Flavonoid glycosides	0.9949	Flavonoids	0.9902	Phenylpropanoids and polyketides	0.9958	both_untrg_better
449.1072	8.36	1	0.00545	**	29940000	33320000	14360000	995800	1090000	1106000	126200000	295600000	129200000	C21H20O11	[M + H]+	Shikimates and Phenylpropanoids	0.9998	Flavonoids	0.9999	Flavonols	0.9741	Flavonoid-3-O-glycosides	0.5966	Flavonoid O-glycosides	0.9982	Flavonoid glycosides	0.9988	Flavonoids	0.9992	Phenylpropanoids and polyketides	0.9989	both_trg_better
219.0264	1.55	1	1		76210000	71960000	50860000	40870000	165900000	84600000	118200000	109100000	92740000	C9H8O5	[M + Na]+	Polyketides	0.7503	Cyclic polyketides	0.5288	2-pyrone derivatives	0.2103	1-hydroxy-2-unsubstituted benzenoids	0.5186		NA	1-hydroxy-2-unsubstituted benzenoids	0.5186	Phenols	0.6565	Benzenoids	0.9348
291.0859	7.72	1	0.00769	**	37910000	38300000	8650000	58250000	248100000	122900000	1696000	7051000	635900	C15H14O6	[M + H]+	Shikimates and Phenylpropanoids	0.9998	Flavonoids	0.9996	Flavan-3-ols	1	Catechins	0.9953	Flavan-3-ols	0.9948	Flavans	0.9975	Flavonoids	0.9992	Phenylpropanoids and polyketides	0.9954	both_untrg_better
304.2993	10.07	1	0.59903		45440000	33860000	35790000	15580000	20170000	27530000	18360000	30660000	28810000	C21H37N	[M + H]+	Alkaloids	0.9883	Pseudoalkaloids	0.2765	Phenylalanine-derived alkaloids	0.3052	Phenylmethylamines	1		NA	Phenylmethylamines	1	Benzene and substituted derivatives	1	Benzenoids	1	trg_only
185.5278	8.42	1	0.00814	**	271500	583200	697800	1459000	3305000	2507000	933900	905900	1165000	NA	NA	NA	NA	NA	NA	NA	NA	NA	NA	NA	NA	NA	NA	NA	NA	NA	NA	NA
314.341	11.05	1	1		16470000	27600000	24310000	25320000	4124000	14020000	6428000	19470000	13960000	C20H43NO	[M + H]+	Fatty acids	0.9997	Fatty amides	0.958	N-acyl amines	0.8607	N-acyl amines	0.9724	N-acyl amines	0.9724	Fatty amides	0.9808	Fatty Acyls	0.9622	Lipids and lipid-like molecules	0.9433	trg_only
595.144	8.75	1	0.02174	*	1662000	219100000	15390000	488800	71010	111500	41740000	68540000	34360000	NA	NA	NA	NA	NA	NA	NA	NA	NA	NA	NA	NA	NA	NA	NA	NA	NA	NA	NA	Tiliroside
139.0388	7.95	1	0.13491		36360000	13360000	9027000	25250000	82080000	80220000	13090000	28230000	15540000	C7H6O3	[M + H]+	Polyketides	0.8325	Phenolic acids (C6-C1)	0.7164	Simple phenolic acids	0.5658	1-hydroxy-2-unsubstituted benzenoids	0.9105		NA	1-hydroxy-2-unsubstituted benzenoids	0.9105	Phenols	0.9249	Benzenoids	0.9643	trg_only
214.0327	7.96	1	0.02942	*	28310000	14430000	12590000	27190000	75390000	66470000	11910000	19300000	11840000	NA	NA	NA	NA	NA	NA	NA	NA	NA	NA	NA	NA	NA	NA	NA	NA	NA	NA	NA
332.3304	10.51	1	0.51176		17130000	13510000	16020000	6510000	9267000	10610000	7685000	13820000	10880000	C23H41N	[M + H]+	Alkaloids	0.9645	Pseudoalkaloids	0.174	Phenylalanine-derived alkaloids	0.2839	Phenylmethylamines	0.9994		NA	Phenylmethylamines	0.9994	Benzene and substituted derivatives	0.9999	Benzenoids	0.9998	trg_only
205.0274	7.95	1	0.03865	*	25440000	9060000	5868000	24180000	60320000	66440000	9888000	19530000	11390000	NA	NA	NA	NA	NA	NA	NA	NA	NA	NA	NA	NA	NA	NA	NA	NA	NA	NA	NA
510.3057	8.05	1	0.01664	*	26040000	16060000	20190000	801800	6059000	1075000	70090000	31240000	25900000	C27H43NO8	[M + H]+	Alkaloids	0.9438	Pseudoalkaloids (transamidation)	0.365	Piperidine alkaloids	0.0897	Hexoses	0.9697	Monosaccharides	0.9766	Carbohydrates and carbohydrate conjugates	0.9957	Organooxygen compounds	1	Organic oxygen compounds	1	both_trg_better
341.0863	7.52	1	0.01086	*	2059000	654900	2483000	14590000	47620000	38620000	571000	179200	623800	C15H16O9	[M + H]+	Shikimates and Phenylpropanoids	0.9911	Coumarins	0.9949	Simple coumarins	0.9931	Coumarin glycosides	0.9963		NA	Coumarin glycosides	0.9963	Coumarins and derivatives	0.9964	Phenylpropanoids and polyketides	0.9972	trg_only
209.0443	7.81	1	0.00712	**	3578000	4558000	7099000	38860000	82660000	82710000	1109000	999400	2915000	C10H8O5	[M + H]+	Shikimates and Phenylpropanoids	0.9999	Coumarins	0.9999	Simple coumarins	0.9928	7-hydroxycoumarins	0.9303	7-hydroxycoumarins	0.9303	Hydroxycoumarins	0.9954	Coumarins and derivatives	1	Phenylpropanoids and polyketides	0.9999		Fraxetin
454.2919	10.95	1	1		24790000	13790000	14720000	9524000	17800000	10620000	16790000	22120000	13050000	C21H44NO7P	[M + H]+	Fatty acids	0.9985	Glycerophospholipids	0.9989	Glycerophosphoethanolamines	0.9913	Amino acids and derivatives	0.9935	Amino acids and derivatives	0.9935	Amino acids, peptides, and analogues	0.9934	Carboxylic acids and derivatives	0.9989	Organic acids and derivatives	1		1-16:0-lysoPE
259.5462	7.49	1	0.01707	*	1141000	538100	1972000	13750000	35650000	22110000	510500	143500	837600	NA	NA	NA	NA	NA	NA	NA	NA	NA	NA	NA	NA	NA	NA	NA	NA	NA	NA	NA
228.1953	9.69	1	1		11260000	13220000	12790000	15600000	11990000	12140000	11500000	12400000	11950000	C13H25NO2	[M + H]+	Fatty acids	0.8326	Fatty amides	0.4813	Primary amides	0.2849	Amino acids	0.8498	Amino acids and derivatives	0.9197	Amino acids, peptides, and analogues	0.9168	Carboxylic acids and derivatives	0.9935	Organic acids and derivatives	0.9981	trg_only
435.0917	8.33	1	0.13672		61870000	3110000	4453000	300000	1791000	1398000	34800000	8030000	4239000	C20H18O11	[M + H]+	Shikimates and Phenylpropanoids	0.9998	Flavonoids	0.9998	Flavonols	0.9984	Flavonoid-3-O-glycosides	0.999	Flavonoid O-glycosides	0.9992	Flavonoid glycosides	0.999	Flavonoids	0.9992	Phenylpropanoids and polyketides	0.998	trg_only	Quercetin-pentoside
326.3775	10.7	1	1		7517000	4261000	5841000	5163000	5684000	6203000	4773000	5307000	4596000	C22H47N	[M + H]+	Fatty acids	0.9906	Fatty acyls	0.9853	Hydrocarbons	0.9988	Monoalkylamines	0.974	Primary amines	0.9624	Amines	0.9993	Organonitrogen compounds	0.9996	Organic nitrogen compounds	0.9999	trg_only
345.5484	8.74	1	0.0179	*	311500	47750000	5279000	15040	25820	0	13880000	24970000	13060000	NA	NA	NA	NA	NA	NA	NA	NA	NA	NA	NA	NA	NA	NA	NA	NA	NA	NA	NA
203.5632	1.49	1	1		17340000	18080000	22630000	17690000	9101000	7469000	14450000	12780000	39660000	NA	NA	NA	NA	NA	NA	NA	NA	NA	NA	NA	NA	NA	NA	NA	NA	NA	NA	NA
258.2786	10.07	1	0.99255		2708000	2712000	2496000	2299000	2440000	2959000	2877000	2486000	6260000	C16H35NO	[M + H]+	Fatty acids	0.9844	Fatty acyls	0.8199	Hydrocarbons	0.8798	Alkanolamines	0.7011	Alkanolamines	0.7011	Amines	0.9979	Organonitrogen compounds	0.9999	Organic nitrogen compounds	0.9999	trg_only
460.2684	10.38	1	0.04912	*	3591000	3959000	3093000	3446000	3047000	2484000	3825000	5225000	5871000	C26H37NO6	[M + H]+	Polyketides	0.4549	Macrolides	0.1972	Open-chain polyketides	0.1234	Alkaloids and derivatives	0.5589		NA		NA		NA	Alkaloids and derivatives	0.5589	trg_only
478.2918	10.68	1	0.21005		6578000	9596000	5648000	1013000	4544000	2599000	9544000	8167000	6005000	C23H44NO7P	[M + H]+	Fatty acids	0.999	Glycerophospholipids	0.9996	Glycerophosphoethanolamines	0.9976	Amino acids and derivatives	0.9567	Amino acids and derivatives	0.9567	Amino acids, peptides, and analogues	0.9576	Carboxylic acids and derivatives	0.9996	Organic acids and derivatives	1	trg_only	1-18:2-lysoPE
289.2369	9.38	1	0.00712	**	594000	1079000	1105000	375100	569000	408900	21810000	9813000	13400000	C16H32O4	[M + H]+	Fatty acids	0.9983	Fatty Acids and Conjugates	0.9351	Hydroxy fatty acids	0.9103	Long-chain fatty acids	0.8686	Long-chain fatty acids	0.8686	Fatty acids and conjugates	0.9821	Fatty Acyls	0.9996	Lipids and lipid-like molecules	0.9992	both_untrg_better
188.2007	8.79	1	1		4488000	5164000	7054000	6044000	8346000	4381000	5617000	28280000	9249000	C11H25NO	[M + H]+	Fatty acids	0.8465	Fatty acyls	0.5958	Hydrocarbons	0.0999	Dialkyl ethers	0.9302	Dialkyl ethers	0.9302	Ethers	0.9891	Organooxygen compounds	0.9986	Organic oxygen compounds	1	trg_only
249.5562	7.84	1	0.00756	**	6694000	12030000	8677000	1205000	1913000	996600	4181000	6404000	5170000	NA	NA	NA	NA	NA	NA	NA	NA	NA	NA	NA	NA	NA	NA	NA	NA	NA	NA	NA
343.2949	9.58	1	0.08111		5752000	4714000	6854000	3585000	8894000	7250000	3960000	4001000	3212000	NA	NA	NA	NA	NA	NA	NA	NA	NA	NA	NA	NA	NA	NA	NA	NA	NA	NA	NA
212.5684	1.5	1	0.01263	*	12950000	4169000	11930000	1159000	1312000	975100	18190000	11830000	13830000	NA	NA	NA	NA	NA	NA	NA	NA	NA	NA	NA	NA	NA	NA	NA	NA	NA	NA	NA
467.1078	8.23	1	0.00788	**	3554000	1726000	325000	421300	159400	204200	14990000	11380000	3456000	NA	NA	NA	NA	NA	NA	NA	NA	NA	NA	NA	NA	NA	NA	NA	NA	NA	NA	NA
387.2009	7.9	1	0.01664	*	3986000	4450000	2959000	1024000	525000	1266000	16240000	10970000	3380000	C19H30O8	[M + H]+	Terpenoids	0.9904	Apocarotenoids	0.9992	Megastigmanes	0.9057	Alkyl glycosides	0.9719	Alkyl glycosides	0.9719	Fatty acyl glycosides	0.972	Fatty Acyls	0.9136	Lipids and lipid-like molecules	0.9936	both_trg_better
304.2114	8.19	1	0.71184		4575000	5386000	5498000	6035000	3561000	6258000	4278000	3235000	4626000	NA	NA	NA	NA	NA	NA	NA	NA	NA	NA	NA	NA	NA	NA	NA	NA	NA	NA	NA
298.0964	7.2	1	0.00741	**	4123000	1109000	1396000	131300	1202000	746800	11020000	11390000	10100000	C11H15N5O3S	[M + H]+	Carbohydrates	0.9942	Nucleosides	0.9952	Purine nucleos(t)ides	0.9981	5'-deoxy-5'-thionucleosides	0.9981		NA	5'-deoxy-5'-thionucleosides	0.9981	5'-deoxyribonucleosides	1	Nucleosides, nucleotides, and analogues	0.9976	both_trg_better
176.0107	1.56	1	0.02174	*	5797000	3946000	2746000	7107000	12530000	8481000	14080000	10100000	8494000	C6H6ClNO3	[M + H]+	Amino acids and Peptides	0.4837	Nicotinic acid alkaloids	0.2245	Aminoacids	0.3938	Hydroxypyridines	0.5042		NA	Hydroxypyridines	0.5042	Pyridines and derivatives	0.4782	Organoheterocyclic compounds	0.9888	trg_only
420.1858	7.84	1	0.00741	**	5728000	11600000	9606000	1516000	995700	649700	4742000	5324000	4839000	C18H29NO10	[M + H]+	Amino acids and Peptides	0.8172	Amino acid glycosides	0.911	Cyanogenic glycosides	0.7517	Cyanogenic glycosides	0.7827	Glycosyl compounds	0.9999	Carbohydrates and carbohydrate conjugates	1	Organooxygen compounds	1	Organic oxygen compounds	1	trg_only
279.5299	8.23	1	0.00741	**	3456000	1268000	140700	45800	32210	114100	9594000	6796000	3664000	NA	NA	NA	NA	NA	NA	NA	NA	NA	NA	NA	NA	NA	NA	NA	NA	NA	NA	NA
270.0417	8.26	1	0.03996	*	1886000	1926000	1619000	13090000	6455000	5485000	1446000	1649000	2257000	C11H15Cl2NO	[M + Na]+	Alkaloids	0.9828	Pseudoalkaloids	0.7362	Phenylalanine-derived alkaloids	0.877	Phenylpropanes	0.5049		NA	Phenylpropanes	0.5049	Benzene and substituted derivatives	0.9979	Benzenoids	0.9999	trg_only
454.3387	10.08	1	0.00777	**	346000	172300	196700	31900000	6667000	2504000	138500	68200	77400	NA	NA	NA	NA	NA	NA	NA	NA	NA	NA	NA	NA	NA	NA	NA	NA	NA	NA	NA
320.294	9.97	1	0.04942	*	14430000	2490000	1937000	214400	894100	252000	4066000	2084000	949000	C21H37NO	[M + H]+	Alkaloids	0.8641	Fatty amides	0.5393	Piperidine alkaloids	0.5095	Benzene and substituted derivatives	0.8525		NA		NA	Benzene and substituted derivatives	0.8525	Benzenoids	0.7159	both_untrg_better
476.2762	10.33	1	0.23298		4712000	3633000	3891000	578200	3301000	717400	3116000	5125000	2350000	C23H42NO7P	[M + H]+	Fatty acids	0.9993	Glycerophospholipids	0.9997	Glycerophosphoethanolamines	0.9934	Amino acids and derivatives	0.8217	Amino acids and derivatives	0.8217	Amino acids, peptides, and analogues	0.818	Carboxylic acids and derivatives	0.9998	Organic acids and derivatives	1		1-18:3-lysoPE
402.3571	10.41	1	0.42934		2815000	1995000	2387000	1680000	2353000	1948000	2234000	1443000	1455000	C23H47NO4	[M + H]+	Fatty acids	0.9748	Fatty amides	0.7131	N-acyl amines	0.2687	Alpha amino acids	0.7778	Amino acids and derivatives	0.0489	Amino acids, peptides, and analogues	0.0463	Carboxylic acids and derivatives	0.9935	Organic acids and derivatives	0.9853	trg_only
234.206	8.42	1	1		427200	963100	297400	262700	156800	154000	216200	448100	841600	C12H27NO3	[M + H]+	Fatty acids	0.5417	Fatty acyls	0.4331	Fatty alcohols	0.4818	1,2-aminoalcohols	0.9303	Alkanolamines	0.941	Amines	0.9708	Organonitrogen compounds	0.9997	Organic nitrogen compounds	0.9998
300.2015	7.56	1	0.1039		2558000	1713000	1575000	1753000	3041000	4861000	1715000	1515000	1200000	C12H26O7	[M + H3N + H]+	Fatty acids	0.9967	Glycerolipids	0.9785	Monoacylglycerols	0.9896	Polyethylene glycols	0.9997	Dialkyl ethers	1	Ethers	1	Organooxygen compounds	1	Organic oxygen compounds	1	trg_only
360.3615	10.91	1	0.13205		1531000	778600	1070000	311000	463200	537300	488600	922000	751900	C25H45N	[M + H]+	Fatty acids	0.6926	Fatty acyls	0.1319	Catechols with side chains	0.27	Phenylmethylamines	0.9728		NA	Phenylmethylamines	0.9728	Benzene and substituted derivatives	0.9973	Benzenoids	0.9859	both_untrg_better
502.2787	10.37	1	0.16719		473500	628000	397400	520000	442000	456200	681900	695300	655700	C26H41NO7	[M + Na]+	Terpenoids	0.969	Diterpenoids	0.4741	Drimane sesquiterpenoids	0.2063	Amino acids and derivatives	0.955	Amino acids and derivatives	0.955	Amino acids, peptides, and analogues	0.9553	Carboxylic acids and derivatives	0.7662	Organic acids and derivatives	0.7984	trg_only
326.2108	11.32	1	0.05412		596500	627000	746900	786300	5415000	1219000	608300	535300	576200	C21H27NO2	[M + H]+	Terpenoids	0.7608	Steroids	0.9388	Androstane steroids	0.6199	17-hydroxysteroids	0.9731	17-hydroxysteroids	0.9731	Hydroxysteroids	0.7994	Steroids and steroid derivatives	0.9619	Lipids and lipid-like molecules	0.8813	both_trg_better
299.1095	9.36	1	0.71184		488000	511500	546700	524700	587800	419100	594100	595400	636800	NA	NA	NA	NA	NA	NA	NA	NA	NA	NA	NA	NA	NA	NA	NA	NA	NA	NA	NA
289.0713	7.92	-1	0.03421	*	223900000	79850000	53950000	248100000	889300000	537800000	102400000	190100000	110500000	NA	NA	NA	NA	NA	NA	NA	NA	NA	NA	NA	NA	NA	NA	NA	NA	NA	NA	NA	Catechin 2
463.0876	8.2	-1	0.00741	**	172800000	54660000	13480000	5307000	7195000	9603000	376000000	301900000	113600000	C21H20O12	[M - H]-	Shikimates and Phenylpropanoids	0.9828	Flavonoids	0.9848	Flavonols	0.9984	Flavonoid-3-O-glycosides	0.9822	Flavonoid O-glycosides	0.9976	Flavonoid glycosides	0.9978	Flavonoids	0.9994	Phenylpropanoids and polyketides	0.9992		Isoquercitrin
447.0925	8.33	-1	0.00545	**	52720000	42460000	19110000	2186000	1421000	1430000	163000000	388700000	193600000	C21H20O11	[M - H]-	Shikimates and Phenylpropanoids	0.9811	Flavonoids	0.9681	Flavonols	0.9893	Flavonoid-3-O-glycosides	0.8811	Flavonoid O-glycosides	0.9968	Flavonoid glycosides	0.9966	Flavonoids	0.9976	Phenylpropanoids and polyketides	0.9992		Astragalin
225.0605	1.56	-1	0.82217		308000000	228400000	396900000	113400000	198300000	189900000	528000000	287300000	414300000	NA	NA	NA	NA	NA	NA	NA	NA	NA	NA	NA	NA	NA	NA	NA	NA	NA	NA	NA
289.0714	7.68	-1	0.00769	**	65070000	66300000	14400000	98210000	372400000	194000000	2685000	10810000	1501000	C10H14N4O4	[M + Cl]-	Carbohydrates	0.6242	Nucleosides	0.654	Purine nucleos(t)ides	0.5454	Pyrimidines and pyrimidine derivatives	0.643		NA	Pyrimidines and pyrimidine derivatives	0.643	Diazines	0.5786	Organoheterocyclic compounds	0.8974		Catechin
301.035	8.91	-1	1		4837000	4260000	1287000	2214000	3912000	2444000	5530000	3019000	2148000	NA	NA	NA	NA	NA	NA	NA	NA	NA	NA	NA	NA	NA	NA	NA	NA	NA	NA	NA	Quercetin
287.0559	8.87	-1	1		202300	390400	197300	366700	30990000	14270000	284600	241600	196300	C10H12N4O4	[M + Cl]-	Alkaloids	0.4474	Nucleosides	0.5946	Purine nucleos(t)ides	0.5071	1-hydroxy-2-unsubstituted benzenoids	0.6238		NA	1-hydroxy-2-unsubstituted benzenoids	0.6238	Phenols	0.5423	Benzenoids	0.9652		Eriodictiol
335.0767	7.92	-1	0.04942	*	74040000	18170000	15050000	60630000	224200000	169500000	26810000	51720000	27780000	C16H16O8	[M - H]-	Shikimates and Phenylpropanoids	0.9109	Flavonoids	0.9567	Flavan-3-ols	0.997	Catechins	0.9973	Flavan-3-ols	0.9948	Flavans	0.9792	Flavonoids	0.9891	Phenylpropanoids and polyketides	0.9763	both_untrg_better
471.0746	1.53	-1	1		56240000	87970000	69480000	86840000	187600000	102800000	45620000	72380000	49410000	NA	NA	NA	NA	NA	NA	NA	NA	NA	NA	NA	NA	NA	NA	NA	NA	NA	NA	NA
593.1291	8.73	-1	0.02702	*	3725000	271400000	39240000	652300	298100	317200	58120000	131900000	78340000	C30H26O13	[M - H]-	Shikimates and Phenylpropanoids	0.9813	Flavonoids	0.9656	Flavonols	0.9967	Flavonoid 3-O-p-coumaroyl glycosides	0.7728	Flavonoid O-glycosides	0.999	Flavonoid glycosides	0.9988	Flavonoids	0.9985	Phenylpropanoids and polyketides	1	both_untrg_better
637.1766	8.6	-1	0.0326	*	392400000	4793000	12120000	223200	58240	84540	4830000	59260	190700	C29H34O16	[M - H]-	Shikimates and Phenylpropanoids	0.8399	Isoflavonoids	0.5801	Isoflavones	0.5542	Flavonoid O-glycosides	0.5652	Flavonoid O-glycosides	0.5652	Flavonoid glycosides	0.4432	Flavonoids	0.4556	Phenylpropanoids and polyketides	0.9632	both_trg_better
577.134	7.8	-1	0.59903		99770000	16810000	15660000	46360000	145800000	132200000	28650000	42960000	31400000	C30H26O12	[M - H]-	Shikimates and Phenylpropanoids	0.9823	Flavonoids	0.9899	Proanthocyanins	0.998	Biflavonoids and polyflavonoids	0.9884		NA	Biflavonoids and polyflavonoids	0.9884	Flavonoids	1	Phenylpropanoids and polyketides	0.9999	both_untrg_better
303.0505	8.39	-1	0.01664	*	462500	431100	401800	1774000	17740000	7177000	755400	503800	449400	C10H12N4O5	[M + Cl]-	Shikimates and Phenylpropanoids	0.6078	Flavonoids	0.4191	Purine nucleos(t)ides	0.1128	Catechols	0.6702	Catechols	0.6702	Benzenediols	0.6507	Phenols	0.9732	Benzenoids	0.9378		Taxifolin
431.0975	8.5	-1	0.03031	*	5793000	4027000	2904000	394700	1009000	415900	1629000	31220000	14360000	C21H20O10	[M - H]-	Shikimates and Phenylpropanoids	0.9844	Flavonoids	0.9413	Flavonols	0.9811	Flavonoid-3-O-glycosides	0.7761	Flavonoid O-glycosides	0.9954	Flavonoid glycosides	0.9948	Flavonoids	0.9943	Phenylpropanoids and polyketides	0.9996		Luteolin-deoxyhexoide
455.3517	12.24	-1	0.02056	*	789200	678600	1386000	39790000	80880000	57360000	1034000	900300	253000	NA	NA	NA	NA	NA	NA	NA	NA	NA	NA	NA	NA	NA	NA	NA	NA	NA	NA	NA
339.0713	7.45	-1	0.00853	**	3146000	1331000	3770000	23590000	53250000	54170000	1418000	688500	1265000	NA	NA	NA	NA	NA	NA	NA	NA	NA	NA	NA	NA	NA	NA	NA	NA	NA	NA	NA	Esculin
281.0662	7.85	-1	0.04078	*	188900000	6031000	1545000	96800	276200	107700	6222000	412700	102000	C8H14N4O5	[M + Cl]-	Carbohydrates	0.5697	Nucleosides	0.5556	Purine nucleos(t)ides	0.5305	Glycerolipids	0.5077		NA		NA	Glycerolipids	0.5077	Lipids and lipid-like molecules	0.0778	both_trg_better
719.201	1.68	-1	0.2217		16430000	22600000	10240000	45140000	96870000	56320000	11020000	32380000	9816000	C30H40O20	[M - H]-	Terpenoids	0.4312	Saccharides	0.3037	Polysaccharides	0.4143	O-glycosyl compounds	0.9929	Glycosyl compounds	0.9964	Carbohydrates and carbohydrate conjugates	1	Organooxygen compounds	1	Organic oxygen compounds	1	trg_only
173.0805	8.23	-1	0.03421	*	10110000	12350000	10510000	88000000	36030000	38600000	12260000	9620000	10590000	C6H12N3O3	[M - H]-	Amino acids and Peptides	0.7201	Small peptides	0.8456	Aminoacids	0.8046	Amino acids and derivatives	0.7022	Amino acids and derivatives	0.7022	Amino acids, peptides, and analogues	0.7019	Carboxylic acids and derivatives	0.9915	Organic acids and derivatives	0.997	both_trg_better
335.0767	7.68	-1	0.00756	**	11990000	10470000	2650000	18140000	64740000	36470000	504200	1805000	239300	C16H16O8	[M - H]-	Shikimates and Phenylpropanoids	0.911	Flavonoids	0.9479	Flavan-3-ols	0.9937	Catechins	0.9948	Flavan-3-ols	0.9885	Flavans	0.962	Flavonoids	0.9838	Phenylpropanoids and polyketides	0.9718	both_untrg_better
447.15	7.81	-1	0.00756	**	20860000	42030000	30640000	5597000	3290000	1939000	17500000	20750000	17490000	C19H28O12	[M - H]-	Shikimates and Phenylpropanoids	0.4124	Phenylethanoids (C6-C2)	0.5109	Phenylethanoids	0.5167	Disaccharides	0.9914	Disaccharides	0.9914	Carbohydrates and carbohydrate conjugates	0.9999	Organooxygen compounds	1	Organic oxygen compounds	1	both_trg_better
329.2329	9.22	-1	0.05507		3621000	7928000	14420000	19600000	27840000	38160000	27070000	13170000	17400000	C18H34O5	[M - H]-	Fatty acids	0.8829	Octadecanoids	0.9617	Other Octadecanoids	0.9853	Lineolic acids and derivatives	0.6371		NA	Lineolic acids and derivatives	0.6371	Fatty Acyls	0.999	Lipids and lipid-like molecules	0.9992		Linoleic acid derivate
433.0769	8.31	-1	0.28864		87380000	3615000	6038000	386600	2836000	3911000	49700000	9668000	5159000	C20H18O11	[M - H]-	Shikimates and Phenylpropanoids	0.9872	Flavonoids	0.9915	Flavonols	0.9991	Flavonoid-3-O-glycosides	0.9939	Flavonoid O-glycosides	0.998	Flavonoid glycosides	0.999	Flavonoids	0.9998	Phenylpropanoids and polyketides	0.9991	trg_only
353.0872	7.69	-1	0.00712	**	4075000	1948000	1477000	2068000	38250000	42470000	331800	121400	177300	NA	NA	NA	NA	NA	NA	NA	NA	NA	NA	NA	NA	NA	NA	NA	NA	NA	NA	NA	Scopoletin-hexoside
369.0819	7.77	-1	0.00712	**	2515000	4675000	5909000	37090000	70550000	65730000	901100	985400	2096000	C13H10N10O4	[M - H]-	Alkaloids	0.8256	Pseudoalkaloids	0.7034	Azo and Azoxy alkaloids	0.6265	Nitroaromatic compounds	0.7332	C-nitro compounds	0.714	Organic nitro compounds	0.7818	Allyl-type 1,3-dipolar organic compounds	0.8328	Organic 1,3-dipolar compounds	0.8927		Fraxin
207.0499	1.69	-1	1		39170000	50230000	59930000	13930000	42880000	38930000	39720000	51180000	23420000	NA	NA	NA	NA	NA	NA	NA	NA	NA	NA	NA	NA	NA	NA	NA	NA	NA	NA	NA
327.2172	9.05	-1	0.359		4598000	5249000	16810000	13350000	21680000	17980000	25590000	14030000	19840000	C18H32O5	[M - H]-	Fatty acids	0.918	Octadecanoids	0.9535	Other Octadecanoids	0.9825	Lineolic acids and derivatives	0.8152		NA	Lineolic acids and derivatives	0.8152	Fatty Acyls	0.9994	Lipids and lipid-like molecules	0.9995		Trihydroxy-linoleic acid
287.2225	9.37	-1	0.00545	**	1282000	2615000	2738000	93870	114800	98680	51810000	21020000	26290000	C16H32O4	[M - H]-	Fatty acids	0.909	Fatty Acids and Conjugates	0.9037	Hydroxy fatty acids	0.96	Medium-chain fatty acids	0.6977	Medium-chain fatty acids	0.6977	Fatty acids and conjugates	0.998	Fatty Acyls	0.9987	Lipids and lipid-like molecules	0.9989	both_trg_better
179.0561	7.24	-1	0.00545	**	332300	314600	801600	61800	79320	71400	37890000	41850000	38380000	C6H12O6	[M - H]-	Carbohydrates	0.8092	Saccharides	0.6406	Cyclitols	0.5735	Monosaccharides	0.7597	Monosaccharides	0.7597	Carbohydrates and carbohydrate conjugates	0.8407	Organooxygen compounds	1	Organic oxygen compounds	0.9997	both_untrg_better
293.2121	10.75	-1	0.2863		3453000	3234000	13990000	5571000	14330000	7299000	23530000	8690000	22370000	C18H30O3	[M - H]-	Fatty acids	0.9049	Octadecanoids	0.9465	Other Octadecanoids	0.9767	Lineolic acids and derivatives	0.8742		NA	Lineolic acids and derivatives	0.8742	Fatty Acyls	0.9982	Lipids and lipid-like molecules	0.9979		Dehydro-hydroxy-linoleic acid
491.1762	7.86	-1	0.26999		487400	728100	2802000	528200	255300	369900	1771000	82400000	24020000	C21H32O13	[M - H]-	Terpenoids	0.5475	Phenylethanoids (C6-C2)	0.6695	Phenylethanoids	0.6835	Disaccharides	0.8541	Disaccharides	0.8541	Carbohydrates and carbohydrate conjugates	1	Organooxygen compounds	1	Organic oxygen compounds	1	trg_only
865.1973	7.95	-1	1		22390000	3953000	4438000	4764000	34880000	25940000	16120000	16760000	16260000	C45H38O18	[M - H]-	Shikimates and Phenylpropanoids	0.9834	Flavonoids	0.9909	Proanthocyanins	0.9988	Biflavonoids and polyflavonoids	0.9928		NA	Biflavonoids and polyflavonoids	0.9928	Flavonoids	1	Phenylpropanoids and polyketides	0.9999		Catechin trimer
295.2274	11.06	-1	0.09299		1559000	2460000	7846000	10550000	15520000	20960000	14010000	3526000	7108000	C18H32O3	[M - H]-	Fatty acids	0.9413	Octadecanoids	0.9429	Other Octadecanoids	0.9625	Lineolic acids and derivatives	0.6639		NA	Lineolic acids and derivatives	0.6639	Fatty Acyls	0.9995	Lipids and lipid-like molecules	0.9996		Hydroxy-linoleic acid
551.1973	7.57	-1	0.00712	**	523600	983700	976400	8096	36540	27150	41690000	38250000	18220000	C23H36O15	[M - H]-	Shikimates and Phenylpropanoids	0.7025	Lignans	0.4024	Phenylethanoids	0.3993	Alkyl glycosides	0.5427	Alkyl glycosides	0.5427	Fatty acyl glycosides	0.5156	Fatty Acyls	0.5068	Lipids and lipid-like molecules	0.5631	both_trg_better
452.2776	10.94	-1	0.88446		14840000	7190000	9637000	5811000	9689000	6751000	9528000	12680000	7489000	C21H44NO7P	[M - H]-	Fatty acids	0.9596	Glycerophospholipids	0.9449	Glycerophosphoethanolamines	0.9943	Amino acids and derivatives	0.996	Amino acids and derivatives	0.996	Amino acids, peptides, and analogues	0.9961	Carboxylic acids and derivatives	0.9991	Organic acids and derivatives	1
325.0922	7.68	-1	0.02174	*	25580000	9664000	11630000	1191000	2110000	1793000	12510000	14730000	7491000	C10H18N4O6	[M + Cl]-	Amino acids and Peptides	0.6254	Small peptides	0.6905	Aminoacids	0.3693	Alpha amino acids	0.6284	Amino acids and derivatives	0.9297	Amino acids, peptides, and analogues	0.9277	Carboxylic acids and derivatives	0.9791	Organic acids and derivatives	0.9949	both_untrg_better
563.0119	8.21	-1	0.00741	**	6210000	2673000	530000	300200	254800	382800	18540000	15220000	5917000	NA	NA	NA	NA	NA	NA	NA	NA	NA	NA	NA	NA	NA	NA	NA	NA	NA	NA	NA
431.1914	7.86	-1	0.01077	*	14490000	5137000	5749000	1285000	640700	969700	29550000	19160000	6635000	C18H30N3O9	[M - H]-	Terpenoids	0.2251	Fatty acyl glycosides	0.367	Fatty acyl glycosides of mono- and disaccharides	0.2744	Fatty acyl glycosides of mono- and disaccharides	0.5042	Fatty acyl glycosides of mono- and disaccharides	0.5042	Fatty acyl glycosides	0.5068	Fatty Acyls	0.6385	Lipids and lipid-like molecules	0.6809	trg_only
242.1754	9.22	-1	1		6158000	5389000	6299000	5387000	5337000	6296000	5967000	5505000	5334000	C13H25NO3	[M - H]-	Fatty acids	0.5976	Fatty Acids and Conjugates	0.5345	Aminoacids	0.5096	Amino acids	0.9023	Amino acids and derivatives	0.8738	Amino acids, peptides, and analogues	0.873	Carboxylic acids and derivatives	0.9962	Organic acids and derivatives	0.9988	trg_only
388.9958	7.68	-1	0.00712	**	4243000	4749000	1057000	6888000	25220000	11890000	153600	834600	67950	NA	NA	NA	NA	NA	NA	NA	NA	NA	NA	NA	NA	NA	NA	NA	NA	NA	NA	NA
201.1121	8.84	-1	0.15704		4381000	4827000	4694000	10110000	12360000	14380000	5184000	4646000	4350000	NA	NA	NA	NA	NA	NA	NA	NA	NA	NA	NA	NA	NA	NA	NA	NA	NA	NA	NA
539.2122	7.96	-1	0.01332	*	18880000	13080000	13010000	135000	4930000	7480000	751900	613500	636700	C27H32N4O8	[M - H]-	Alkaloids	0.5636	Lignans	0.7497	Neolignans	0.589	Hexoses	0.5121	Monosaccharides	0.9485	Carbohydrates and carbohydrate conjugates	0.9896	Organooxygen compounds	1	Organic oxygen compounds	1	both_trg_better
439.1813	8.08	-1	0.00712	**	7364000	20290000	11140000	617800	636400	864300	3481000	4643000	4320000	C18H32O12	[M - H]-	Terpenoids	0.7842	Monoterpenoids	0.8361	Acyclic monoterpenoids	0.9134	Alkyl glycosides	0.6241	Alkyl glycosides	0.6241	Fatty acyl glycosides	0.6097	Fatty Acyls	0.5817	Lipids and lipid-like molecules	0.7202	both_trg_better
399.0924	7.68	-1	0.07334		1329000	1659000	3090000	3608000	20420000	15640000	2097000	2709000	2707000	C14H20N6O4S2	[M - H]-	Alkaloids	0.6319	Peptide alkaloids	0.2502	Purine alkaloids	0.1633	N-alkylpiperazines	0.6067	N-alkylpiperazines	0.6067	Piperazines	0.6031	Diazinanes	0.5621	Organoheterocyclic compounds	0.9975		Methylesculetin-derivate
443.1915	7.48	-1	0.00712	**	7399000	9008000	11100000	65230	243100	87010	5679000	4592000	4059000	C21H32O10	[M - H]-	Terpenoids	0.8813	Apocarotenoids	0.9735	Apocarotenoids(ε-)	0.9679	Abscisic acids and derivatives	0.9922	Abscisic acids and derivatives	0.9922	Sesquiterpenoids	0.891	Prenol lipids	0.9545	Lipids and lipid-like molecules	0.962	both_untrg_better
212.9196	1.49	-1	1		5390000	9386000	6329000	3715000	7695000	5287000	4214000	7233000	2130000	NA	NA	NA	NA	NA	NA	NA	NA	NA	NA	NA	NA	NA	NA	NA	NA	NA	NA	NA
315.2539	10.75	-1	0.02142	*	2406000	1804000	2319000	4437000	8678000	17620000	1793000	2273000	1581000	C18H36O4	[M - H]-	Fatty acids	0.9003	Octadecanoids	0.8855	Other Octadecanoids	0.9257	Long-chain fatty acids	0.9704	Long-chain fatty acids	0.9704	Fatty acids and conjugates	0.9989	Fatty Acyls	0.9992	Lipids and lipid-like molecules	0.9995	both_trg_better
305.0662	7.53	-1	0.44741		9071000	9126000	1644000	8751000	4749000	4052000	234900	3547000	890000	C15H14O7	[M - H]-	Shikimates and Phenylpropanoids	0.9831	Flavonoids	0.9937	Flavan-3-ols	0.9983	Epigallocatechins	0.917	Flavan-3-ols	0.9998	Flavans	0.9949	Flavonoids	0.9994	Phenylpropanoids and polyketides	0.9993		Gallocatechol
639.156	8.02	-1	0.00756	**	42100	4750000	2485000	3796	27720	5443	17260000	6057000	8894000	C28H32O17	[M - H]-	Shikimates and Phenylpropanoids	0.9735	Flavonoids	0.9473	Flavonols	0.9864	Flavonoid-3-O-glycosides	0.9631	Flavonoid O-glycosides	0.9903	Flavonoid glycosides	0.9908	Flavonoids	0.9925	Phenylpropanoids and polyketides	0.9992	trg_only
325.0479	7.92	-1	0.03721	*	5626000	1355000	988400	4595000	12420000	13320000	1846000	3672000	1893000	C15H14O6	[M + Cl]-	Shikimates and Phenylpropanoids	0.8895	Flavonoids	0.9174	Flavan-3-ols	0.9779	Catechins	0.97	Flavan-3-ols	0.9575	Flavans	0.9229	Flavonoids	0.966	Phenylpropanoids and polyketides	0.9516	trg_only
315.1082	7.76	-1	0.00545	**	2583000	3167000	2634000	257800	100400	51440	12110000	10320000	9264000	C14H20O8	[M - H]-	Shikimates and Phenylpropanoids	0.5957	Phenylethanoids (C6-C2)	0.6248	Phenylethanoids	0.6215	O-glycosyl compounds	0.8591	Glycosyl compounds	0.8471	Carbohydrates and carbohydrate conjugates	0.9617	Organooxygen compounds	1	Organic oxygen compounds	0.9997
593.0229	8.33	-1	0.00545	**	1063000	873200	253600	0	0	0	6121000	12230000	5220000	C17H18N6O14S2	[M - H]-	Shikimates and Phenylpropanoids	0.9077	Flavonoids	0.9073	Flavonols	0.8831	Flavonoid-3-O-glycosides	0.6917	Flavonoid O-glycosides	0.6979	Flavonoid glycosides	0.8829	Flavonoids	0.9844	Phenylpropanoids and polyketides	0.9939	trg_only
245.0424	1.67	-1	0.49494		4393000	4818000	4975000	7231000	17300000	9376000	9055000	8373000	4650000	NA	NA	NA	NA	NA	NA	NA	NA	NA	NA	NA	NA	NA	NA	NA	NA	NA	NA	NA
401.0483	8.89	-1	0.51176		51020	64220	12100	37490	3574000	1503000	109400	53350	30310	NA	NA	NA	NA	NA	NA	NA	NA	NA	NA	NA	NA	NA	NA	NA	NA	NA	NA	NA
476.2776	10.67	-1	0.07661		6749000	4561000	3804000	911700	2281000	1999000	4245000	4649000	2004000	C23H44NO7P	[M - H]-	Fatty acids	0.9841	Glycerophospholipids	0.9451	Glycerophosphoethanolamines	0.9896	Amino acids and derivatives	0.994	Amino acids and derivatives	0.994	Amino acids, peptides, and analogues	0.9941	Carboxylic acids and derivatives	0.9999	Organic acids and derivatives	1	trg_only
323.1341	7.6	-1	0.28892		3058000	2749000	3408000	2718000	8061000	4022000	4120000	4334000	3626000	C14H20N4O5	[M - H]-	Carbohydrates	0.6459	Nucleosides	0.6418	Purine nucleos(t)ides	0.4643	Glycosylamines	0.526	Glycosyl compounds	0.6317	Carbohydrates and carbohydrate conjugates	0.7354	Organooxygen compounds	0.9997	Organic oxygen compounds	0.9999	both_trg_better
417.2124	8.36	-1	0.01086	*	3011000	4996000	6117000	118600	286500	309300	7299000	6554000	8158000	C20H34O9	[M - H]-	Shikimates and Phenylpropanoids	0.9124	Flavonoids	0.8641	Flavonols	0.9579	Flavonoid-3-O-glycosides	0.8625	Flavonoid O-glycosides	0.9658	Flavonoid glycosides	0.9679	Flavonoids	0.966	Phenylpropanoids and polyketides	0.9821	both_trg_better
477.103	8.5	-1	0.19122		9215000	1879000	990800	4498000	113200	184800	1681000	11160000	6880000	C22H22O12	[M - H]-	Shikimates and Phenylpropanoids	0.9782	Flavonoids	0.9533	Flavonols	0.9903	Flavonoid-3-O-glycosides	0.9187	Flavonoid O-glycosides	0.9909	Flavonoid glycosides	0.9889	Flavonoids	0.9974	Phenylpropanoids and polyketides	0.999
427.1812	7.93	-1	0.02056	*	907000	1452000	918000	21400000	7480000	11320000	1393000	1597000	774200	C18H28N4O8	[M - H]-	Carbohydrates	0.6733	Aminosugars and aminoglycosides	0.5217	Aminoglycosides	0.5152	Aminocyclitol glycosides	0.5145	Aminosaccharides	0.3137	Carbohydrates and carbohydrate conjugates	0.9511	Organooxygen compounds	1	Organic oxygen compounds	1	both_trg_better
562.3142	10.44	-1	0.14823		12900000	4066000	7215000	808800	6216000	1966000	5906000	5992000	4590000	C28H49NO8	[M + Cl]-	Fatty acids	0.8208	Glycerolipids	0.5738	Glycosylmonoacylglycerols	0.2946	O-glycosyl compounds	0.6224	Glycosyl compounds	0.3842	Carbohydrates and carbohydrate conjugates	0.5915	Organooxygen compounds	1	Organic oxygen compounds	1	trg_only
215.1279	9.16	-1	0.14616		2653000	2820000	2384000	3998000	4811000	5390000	2892000	2277000	2260000	C11H20O4	[M - H]-	Fatty acids	0.8937	Fatty Acids and Conjugates	0.96	Dicarboxylic acids	0.9791	Medium-chain fatty acids	0.9346	Medium-chain fatty acids	0.9346	Fatty acids and conjugates	0.978	Fatty Acyls	0.9744	Lipids and lipid-like molecules	0.9808	both_trg_better
287.022	8.53	-1	0.00966	**	792300	1302000	1414000	5547000	6305000	6334000	1589000	1634000	1515000	C14H8N2O3	[M + Cl]-	Alkaloids	0.662	Anthranilic acid alkaloids	0.5543	Quinazoline alkaloids	0.3206	Benzenoids	0.9987		NA		NA		NA	Benzenoids	0.9987	trg_only
304.9082	1.36	-1	0.0833		4274000	4623000	4397000	3383000	900700	728800	4113000	2957000	5603000	NA	NA	NA	NA	NA	NA	NA	NA	NA	NA	NA	NA	NA	NA	NA	NA	NA	NA	NA
261.1339	8.35	-1	0.02056	*	524400	753200	806000	3828000	13250000	10860000	786000	641500	671600	NA	NA	NA	NA	NA	NA	NA	NA	NA	NA	NA	NA	NA	NA	NA	NA	NA	NA	NA
547.017	8.35	-1	0.00712	**	494600	730800	392800	15350	0	11910	919000	7631000	3070000	NA	NA	NA	NA	NA	NA	NA	NA	NA	NA	NA	NA	NA	NA	NA	NA	NA	NA	NA
415.1967	8.3	-1	0.01577	*	5764000	4074000	969900	187700	243600	508900	9015000	4662000	2459000	C20H32O9	[M - H]-	Shikimates and Phenylpropanoids	0.6171	Flavonoids	0.1435	Flavan-3-ols	0.5141	Flavan-3-ols	0.727	Flavan-3-ols	0.727	Flavans	0.3661	Flavonoids	0.2105	Phenylpropanoids and polyketides	0.2424
329.1236	8.12	-1	0.00756	**	562800	762600	908700	545200	709500	241700	4998000	21020000	9589000	C16H18N4O4	[M - H]-	Alkaloids	0.5871	Nucleosides	0.522	Purine nucleos(t)ides	0.4975	Pyrimidones	0.5152	Pyrimidones	0.5152	Pyrimidines and pyrimidine derivatives	0.7573	Diazines	0.758	Organoheterocyclic compounds	0.9957	trg_only
271.061	9.2	-1	0.15491		270600	432300	161500	982000	16620000	11180000	474600	355500	280400	C10H12N4O3	[M + Cl]-	Alkaloids	0.5289	Flavonoids	0.3699	Imidazole alkaloids	0.1388	1-hydroxy-2-unsubstituted benzenoids	0.9407		NA	1-hydroxy-2-unsubstituted benzenoids	0.9407	Phenols	0.9155	Benzenoids	0.9981	both_trg_better
227.128	9.31	-1	1		2636000	2737000	2492000	2335000	1972000	2177000	5725000	1309000	2171000	C12H20O4	[M - H]-	Fatty acids	0.8339	Fatty Acids and Conjugates	0.8907	Dicarboxylic acids	0.9209	Medium-chain fatty acids	0.9033	Medium-chain fatty acids	0.9033	Fatty acids and conjugates	0.9765	Fatty Acyls	0.9555	Lipids and lipid-like molecules	0.9613	trg_only
438.996	7.45	-1	0.00916	**	232700	96700	295600	2045000	4274000	4579000	96580	22070	103800	NA	NA	NA	NA	NA	NA	NA	NA	NA	NA	NA	NA	NA	NA	NA	NA	NA	NA	NA
245.0923	8.35	-1	0.00916	**	156500	139100	1166000	431600	338400	680000	2702000	8110000	11010000	C13H14N2O3	[M - H]-	Amino acids and Peptides	0.8971	Small peptides	0.9614	Dipeptides	1	N-acyl-alpha amino acids	0.9876	Amino acids and derivatives	0.9997	Amino acids, peptides, and analogues	0.9997	Carboxylic acids and derivatives	1	Organic acids and derivatives	1
429.176	8.35	-1	0.01577	*	5581000	2382000	1236000	382000	264100	318200	6136000	5487000	1972000	C20H30O10	[M - H]-	Terpenoids	0.803	Monoterpenoids	0.714	Iridoids monoterpenoids	0.6246	Terpene glycosides	0.7552		NA	Terpene glycosides	0.7552	Prenol lipids	0.8235	Lipids and lipid-like molecules	0.8574	trg_only
201.0757	7.75	-1	0.02142	*	1812000	2750000	2129000	1657000	1579000	1851000	6678000	3922000	3741000	C7H12N3O4	[M - H]-	Amino acids and Peptides	0.5129	Small peptides	0.6423	Aminoacids	0.5588	Guanidines	0.5886		NA	Guanidines	0.5886	Organonitrogen compounds	0.9801	Organic nitrogen compounds	0.9947
559.3117	10.7	-1	0.01183	*	5073000	2789000	4498000	56750	550300	57410	2045000	1441000	2008000	NA	NA	NA	NA	NA	NA	NA	NA	NA	NA	NA	NA	NA	NA	NA	NA	NA	NA	NA
394.2954	10.08	-1	0.53102		1469000	1302000	1224000	563500	762400	853300	641900	1189000	1161000	NA	NA	NA	NA	NA	NA	NA	NA	NA	NA	NA	NA	NA	NA	NA	NA	NA	NA	NA
417.0821	8.43	-1	0.03421	*	11760000	474100	1053000	43160	179700	141300	6556000	4279000	1629000	NA	NA	NA	NA	NA	NA	NA	NA	NA	NA	NA	NA	NA	NA	NA	NA	NA	NA	NA	Kaempferol-pentoside
549.2543	8.25	-1	0.02142	*	8612000	3841000	1598000	107800	495000	358200	2408000	2115000	879400	NA	NA	NA	NA	NA	NA	NA	NA	NA	NA	NA	NA	NA	NA	NA	NA	NA	NA	NA
474.2617	10.33	-1	0.13491		3362000	2334000	2514000	507100	2206000	578000	2538000	2131000	1530000	C23H42NO7P	[M - H]-	Fatty acids	0.9832	Glycerophospholipids	0.9534	Glycerophosphoethanolamines	0.9933	Amino acids and derivatives	0.9942	Amino acids and derivatives	0.9942	Amino acids, peptides, and analogues	0.9943	Carboxylic acids and derivatives	0.9998	Organic acids and derivatives	1	trg_only
299.0769	7.5	-1	0.02056	*	1870000	4675000	2304000	88850	884700	62990	2150000	3829000	2453000	C8H16N4O6	[M + Cl]-	Amino acids and Peptides	0.4246	Small peptides	0.552	Aminoacids	0.4206	Alpha amino acids and derivatives	0.6077	Amino acids and derivatives	0.528	Amino acids, peptides, and analogues	0.5253	Carboxylic acids and derivatives	0.6575	Organic acids and derivatives	0.9034	trg_only
377.1417	12.03	-1	0.01086	*	958100	267200	968700	265800	1208000	407900	4367000	1821000	2603000	NA	NA	NA	NA	NA	NA	NA	NA	NA	NA	NA	NA	NA	NA	NA	NA	NA	NA	NA
503.1762	8.36	-1	0.01707	*	6574000	2833000	2418000	6101	69610	31840	1223000	2239000	4624000	C16H33N6O8P	[M + Cl]-	Carbohydrates	0.7022	Nucleosides	0.7105	Pyrimidine nucleos(t)ides	0.5177	Pentose phosphates	0.6339	Monosaccharides	0.93	Carbohydrates and carbohydrate conjugates	0.9235	Organooxygen compounds	0.9988	Organic oxygen compounds	0.9999	both_untrg_better
326.902	1.47	-1	0.03421	*	1463000	2507000	1638000	805000	1403000	1837000	515800	532300	694600	NA	NA	NA	NA	NA	NA	NA	NA	NA	NA	NA	NA	NA	NA	NA	NA	NA	NA	NA
425.166	7.69	-1	0.01643	*	984900	1871000	2053000	2341000	6834000	2681000	1374000	773100	853300	C17H30O12	[M - H]-	Terpenoids	0.7113	Monoterpenoids	0.7825	Acyclic monoterpenoids	0.6765	Disaccharides	0.9403	Disaccharides	0.9403	Carbohydrates and carbohydrate conjugates	1	Organooxygen compounds	1	Organic oxygen compounds	1	trg_only
213.1122	9.02	-1	0.00966	**	883500	1325000	1109000	2626000	4873000	3821000	1731000	1316000	1517000	NA	NA	NA	NA	NA	NA	NA	NA	NA	NA	NA	NA	NA	NA	NA	NA	NA	NA	NA
333.2198	11.66	-1	0.01883	*	154800	199300	168000	2806000	6234000	7656000	197900	152800	212600	NA	NA	NA	NA	NA	NA	NA	NA	NA	NA	NA	NA	NA	NA	NA	NA	NA	NA	NA
581.0228	8.2	-1	0.00741	**	1545000	390600	69910	12370	16450	39500	3439000	2668000	989900	NA	NA	NA	NA	NA	NA	NA	NA	NA	NA	NA	NA	NA	NA	NA	NA	NA	NA	NA
541.174	8.4	-1	0.00636	**	5972000	3503000	2642000	45360	185800	239400	668300	618300	522000	C28H30N2O7	[M + Cl]-	Alkaloids	0.6123	Tryptophan alkaloids	0.5458	Carboline alkaloids	0.36	Beta carbolines	0.6163	Beta carbolines	0.6163	Pyridoindoles	0.5905	Indoles and derivatives	0.4001	Organoheterocyclic compounds	0.9966
387.2859	9.58	-1	0.09942		1415000	1126000	1543000	882800	2302000	1460000	937600	954000	1004000	C18H38N5O4	[M - H]-	Alkaloids	0.4506	Small peptides	0.4673	Tripeptides	0.43	Amino acids and derivatives	0.7515	Amino acids and derivatives	0.7515	Amino acids, peptides, and analogues	0.762	Carboxylic acids and derivatives	0.9469	Organic acids and derivatives	0.9972	trg_only
463.1812	7.68	-1	0.34607		2054000	2194000	2087000	399800	1127000	1536000	1636000	584600	848500	C17H24N10O6	[M - H]-	Carbohydrates	0.7554	Nucleosides	0.7587	Purine nucleos(t)ides	0.551	Purine nucleosides	0.528		NA		NA	Purine nucleosides	0.528	Nucleosides, nucleotides, and analogues	0.546	trg_only
242.9392	1.45	-1	0.02259	*	2311000	3380000	3193000	1599000	729500	592000	1349000	1832000	1419000	C4H7O6P3	[M - H]-	Fatty acids	0.5695	Fatty acyls	0.5774	Fatty alcohols	0.4546	Phosphate esters	0.7379		NA	Phosphate esters	0.7379	Organic phosphoric acids and derivatives	0.798	Organic acids and derivatives	0.9993	trg_only
447.1137	7.29	-1	0.00756	**	2380000	3126000	2584000	47300	185100	91960	955500	918000	1905000	C18H24O13	[M - H]-	Shikimates and Phenylpropanoids	0.7311	Phenolic acids (C6-C1)	0.6152	Simple phenolic acids	0.6184	Phenolic glycosides	0.7626	Glycosyl compounds	0.988	Carbohydrates and carbohydrate conjugates	0.9997	Organooxygen compounds	1	Organic oxygen compounds	1	both_trg_better
501.0689	7.81	-1	0.01086	*	1347000	3023000	2147000	280700	223100	152700	1190000	1649000	1380000	NA	NA	NA	NA	NA	NA	NA	NA	NA	NA	NA	NA	NA	NA	NA	NA	NA	NA	NA
554.2959	8.02	-1	0.01164	*	1320000	1539000	1235000	29480	386900	67690	5782000	2107000	1948000	C23H45N5O8	[M + Cl]-	Carbohydrates	0.7715	Aminosugars and aminoglycosides	0.571	Aminoglycosides	0.6006	2-deoxystreptamine aminoglycosides	0.6069	Aminosaccharides	0.788	Carbohydrates and carbohydrate conjugates	0.9943	Organooxygen compounds	0.9999	Organic oxygen compounds	0.9998	trg_only
721.3648	10.15	-1	0.71184		2014000	763400	1429000	531100	1015000	540800	2140000	1027000	1370000	NA	NA	NA	NA	NA	NA	NA	NA	NA	NA	NA	NA	NA	NA	NA	NA	NA	NA	NA
291.1963	10.98	-1	0.04912	*	708700	630200	1492000	280400	676300	366400	1247000	898900	1421000	C18H28O3	[M - H]-	Fatty acids	0.791	Octadecanoids	0.8736	Other Octadecanoids	0.9064	Lineolic acids and derivatives	0.6677		NA	Lineolic acids and derivatives	0.6677	Fatty Acyls	0.9905	Lipids and lipid-like molecules	0.9911	both_untrg_better
229.1437	9.47	-1	0.5255		802400	1056000	749000	1306000	1133000	1179000	1286000	869300	985900	NA	NA	NA	NA	NA	NA	NA	NA	NA	NA	NA	NA	NA	NA	NA	NA	NA	NA	NA
515.0795	8.33	-1	0.0111	*	305700	368300	153100	11090	888700	307300	1066000	3727000	1280000	NA	NA	NA	NA	NA	NA	NA	NA	NA	NA	NA	NA	NA	NA	NA	NA	NA	NA	NA
243.1595	9.79	-1	1		716900	829300	689600	735100	914900	958700	858300	726000	713000	NA	NA	NA	NA	NA	NA	NA	NA	NA	NA	NA	NA	NA	NA	NA	NA	NA	NA	NA
501.0577	8.32	-1	0.0111	*	395200	67130	38150	3086000	3808000	2748000	711500	595100	56040	NA	NA	NA	NA	NA	NA	NA	NA	NA	NA	NA	NA	NA	NA	NA	NA	NA	NA	NA
231.1229	8.41	-1	0.04834	*	705900	673500	757300	2035000	2289000	3070000	858400	627700	662000	C11H20O5	[M - H]-	Fatty acids	0.8037	Fatty Acids and Conjugates	0.9458	Hydroxy fatty acids	0.9601	Medium-chain hydroxy acids and derivatives	0.7778		NA	Medium-chain hydroxy acids and derivatives	0.7778	Hydroxy acids and derivatives	0.9017	Organic acids and derivatives	0.9999	trg_only
247.1179	8.1	-1	0.01086	*	294200	273300	275000	2858000	3237000	3197000	366300	304100	416300	NA	NA	NA	NA	NA	NA	NA	NA	NA	NA	NA	NA	NA	NA	NA	NA	NA	NA	NA
125.0956	8.54	-1	0.02453	*	446900	548300	575700	2223000	2393000	2490000	547300	576900	531400	C6H12N3	[M - H]-	Alkaloids	0.7117	Pseudoalkaloids	0.5208	Purine alkaloids	0.4233	Heteroaromatic compounds	0.7322		NA		NA	Heteroaromatic compounds	0.7322	Organoheterocyclic compounds	0.9885	trg_only
418.2157	8.36	-1	0.00756	**	632300	1105000	1176000	79330	70910	106800	1670000	1437000	1507000	NA	NA	NA	NA	NA	NA	NA	NA	NA	NA	NA	NA	NA	NA	NA	NA	NA	NA	NA
422.327	10.51	-1	0.45199		519100	486700	467800	146300	264400	286900	210600	400100	392700	NA	NA	NA	NA	NA	NA	NA	NA	NA	NA	NA	NA	NA	NA	NA	NA	NA	NA	NA
521.2593	8.6	-1	1		872200	1442000	219600	585400	1521000	527300	2616000	1064000	712000	C24H42O12	[M - H]-	Terpenoids	0.7743	Apocarotenoids	0.9568	Megastigmanes	0.8367	Alkyl glycosides	0.6653	Alkyl glycosides	0.6653	Fatty acyl glycosides	0.6242	Fatty Acyls	0.6493	Lipids and lipid-like molecules	0.8123	both_trg_better
605.2401	12.06	-1	0.00545	**	858800	967600	961500	0	0	0	523600	235000	468000	C34H38O10	[M - H]-	Polyketides	0.7053	Meroterpenoids	0.6258	Bisnaphthalenes	0.6096	Naphthopyrans	0.5728		NA		NA	Naphthopyrans	0.5728	Organoheterocyclic compounds	0.8913	both_trg_better
273.2069	9.1	-1	0.00741	**	44070	100500	82390	104300	123800	116000	1797000	1957000	1706000	C15H30O4	[M - H]-	Fatty acids	0.8879	Fatty Acids and Conjugates	0.884	Hydroxy fatty acids	0.969	Long-chain fatty acids	0.5085	Long-chain fatty acids	0.5085	Fatty acids and conjugates	0.9976	Fatty Acyls	0.9983	Lipids and lipid-like molecules	0.9985	both_trg_better
202.1155	8.84	-1	0.06928		520500	443000	534500	1039000	1332000	1650000	526300	507600	431900	NA	NA	NA	NA	NA	NA	NA	NA	NA	NA	NA	NA	NA	NA	NA	NA	NA	NA	NA
298.2466	11.23	-1	0.03489	*	395500	490100	649800	1194000	1284000	1558000	331200	526500	395900	NA	NA	NA	NA	NA	NA	NA	NA	NA	NA	NA	NA	NA	NA	NA	NA	NA	NA	NA
325.1499	7.08	-1	0.01577	*	879000	1470000	1035000	92300	17640	8553	731600	1179000	554100	C13H26O9	[M - H]-	Fatty acids	0.4688	Fatty acyl glycosides	0.6295	Fatty acyl glycosides of mono- and disaccharides	0.6401	Alkyl glycosides	0.7839	Alkyl glycosides	0.7839	Fatty acyl glycosides	0.7462	Fatty Acyls	0.7639	Lipids and lipid-like molecules	0.7681	trg_only
361.1993	10.75	-1	0.17457		158000	138300	766000	244500	658000	337500	1135000	441800	974800	C19H28N3O4	[M - H]-	Alkaloids	0.5225	Small peptides	0.1274	Dipeptides	0.1333	Alpha amino acids and derivatives	0.6455	Amino acids and derivatives	0.8185	Amino acids, peptides, and analogues	0.8275	Carboxylic acids and derivatives	0.9919	Organic acids and derivatives	0.9996
543.116	7.48	-1	0.00741	**	496200	982300	935300	0	4220	0	375800	363200	480200	NA	NA	NA	NA	NA	NA	NA	NA	NA	NA	NA	NA	NA	NA	NA	NA	NA	NA	NA
416.3738	10.72	-1	1		152400	87910	137200	99690	124900	101600	103700	135500	84110	NA	NA	NA	NA	NA	NA	NA	NA	NA	NA	NA	NA	NA	NA	NA	NA	NA	NA	NA
245.1177	9.56	-1	1		43190	40380	53290	42680	2696000	145200	25580	46680	41240	C15H18O3	[M - H]-	Terpenoids	0.6019	Monoterpenoids	0.2473	Podocarpane diterpenoids	0.4642	Naphthalenes	0.6233		NA		NA	Naphthalenes	0.6233	Benzenoids	0.9993	trg_only
332.0196	8.54	-1	0.03215	*	89990	112600	126900	443600	506400	651100	126700	150100	142200	C10H11N3O8S	[M - H]-	Amino acids and Peptides	0.5821	β-lactams	0.3575	Cephalosporins	0.3311	Amino acids and derivatives	0.574	Amino acids and derivatives	0.574	Amino acids, peptides, and analogues	0.5755	Carboxylic acids and derivatives	0.9925	Organic acids and derivatives	1	trg_only
244.1631	9.78	-1	1		92560	110900	84060	78710	127600	94640	106100	104300	101300	NA	NA	NA	NA	NA	NA	NA	NA	NA	NA	NA	NA	NA	NA	NA	NA	NA	NA	NA
